# Supplementary material for: Differential Physiological Responses to Salt Stress between Salt-Sensitive and Salt-Tolerant japonica Rice Cultivars at the Post-Germination and Seedling Stages
Source: MDPI journal article supplement (doi:10.3390/plants10112433), 2021-11-11
Supplement: s1 [file s1]

**Supplemental Table S1.** The primer pairs used in this study.

| Primer name | Sequence (5'–3')          |
|-------------|---------------------------|
| OsSOS1-F    | CTCCGTGCTCATAGAATCGC      |
| OsSOS1-R    | ATACTCACTCAAGTGGGTCAATACC |
| OsHAK1-F    | GTTGATGATGCTGATGTTGGAAG   |
| OsHAK1-R    | CCAACACTTTCAGCTGAAAC      |
| OsHAK5-F    | CTTGGAATCTGAGTAAGTACTC    |
| OsHAK5-R    | CGAATCTCCATGCATGTTCTG     |
| OsHKT1,1-F  | TTCACCACTCTTGCGGCTATG     |
| OsHKT1,1-R  | TGTTTGTAGCCAGTCTCCCCAG    |
| OsHKT2,1-F  | CACAGTCTCCTCGTTTGCGAA     |
| OsHKT2,1-R  | GCAAGAATCTGGCCGATGAA      |
| OsActin-F   | AGGAAGGCTGGAAGAGGACC      |
| OsActin-R   | CGGGAAATTGTGAGGGACAT      |
